# Supplementary material
Source: publisher figshare collection journal article supplement (https://frontiersin.figshare.com/ndownloader/files/21622803)
Supplement: Supplementary file [file 21622803]

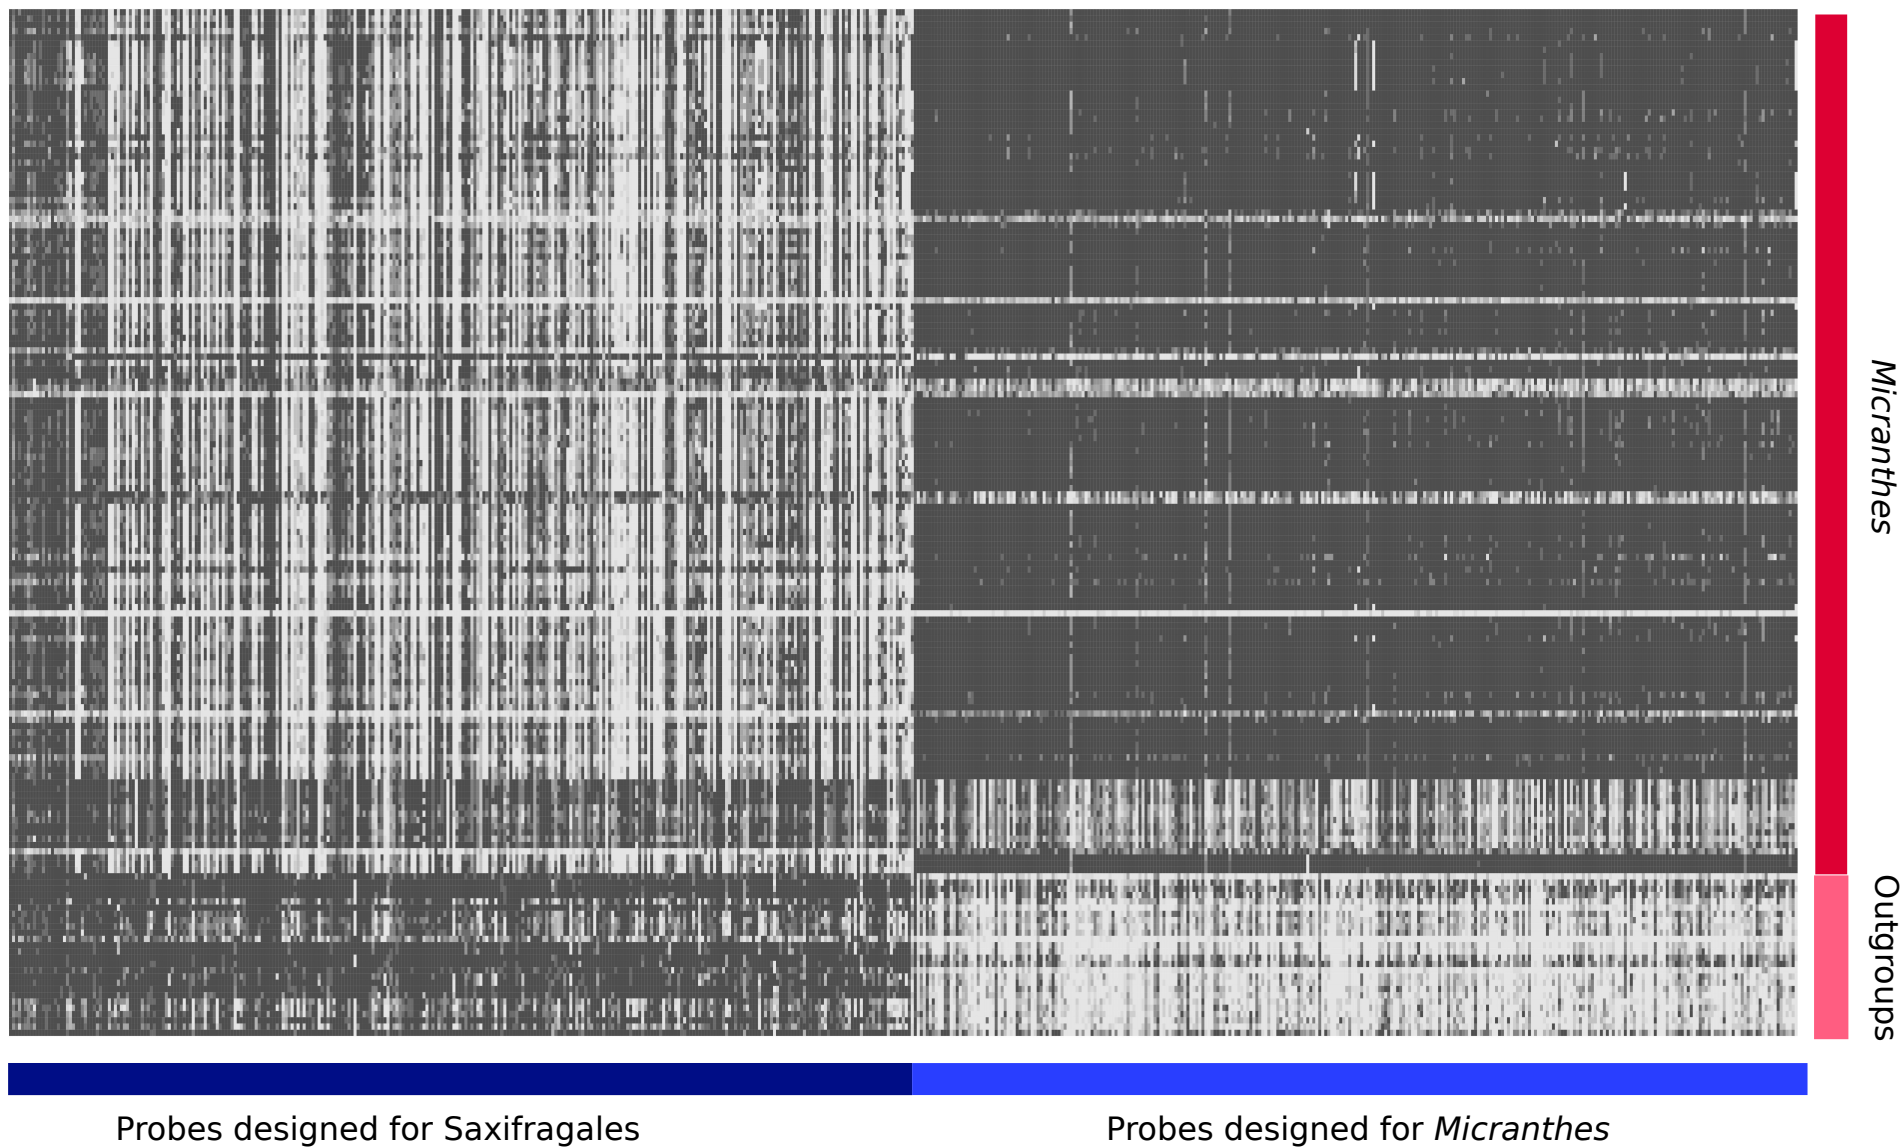

Figure S1. Heatmap showing success of target capture. Darker colors represent higher capture success.
